1 Heritability of the *Symbiodinium* community in vertically- and horizontally-transmitting  
2 broadcast spawning corals

3

4 Kate M. Quigley<sup>1,2\*</sup>, Bette L. Willis<sup>1,2</sup>, Line K. Bay<sup>2,3</sup>

5

6 <sup>1</sup>ARC Centre of Excellence for Coral Reef Studies, and College of Science and  
7 Engineering, James Cook University, Townsville, QLD 4811, Australia

8 <sup>2</sup>AIMS@JCU, Australian Institute of Marine Science and James Cook University,  
9 Townsville, QLD 4811, Australia

10 <sup>3</sup>Australian Institute of Marine Science, PMB3, Townsville, Queensland 4810, Australia

11

12 \*Corresponding author: KM Quigley

13 Address: College of Marine and Environmental Sciences, James Cook University,  
14 Townsville, QLD 4811, Australia

15 Email: [katemarie.quigley@my.jcu.edu.au](mailto:katemarie.quigley@my.jcu.edu.au)

16

17

18

19

20

21

22

23

24

25

26

27

28

29

30

31

32

33

34

35 **Abstract**

36 The dinoflagellate-coral partnership influences the coral holobiont's tolerance to  
37 thermal stress and bleaching. However, the comparative roles of host genetic versus  
38 environmental factors in determining the composition of this symbiosis are largely  
39 unknown. Here we quantify the heritability of the initial *Symbiodinium* communities for  
40 two broadcast-spawning corals with different symbiont transmission modes: *Acropora*  
41 *tenuis* has environmental acquisition, whereas *Montipora digitata* has maternal  
42 transmission. Using high throughput sequencing of the ITS-2 region to characterize  
43 communities in parents, juveniles and eggs, we describe previously undocumented  
44 *Symbiodinium* diversity and dynamics in both corals. After one month of uptake in the  
45 field, *Symbiodinium* communities associated with *A. tenuis* juveniles were dominated by  
46 A3, C1, D1, A-type CCMP828, and D1a in proportional abundances conserved between  
47 experiments in two years. *M. digitata* eggs were predominantly characterized by C15,  
48 D1, and A3. In contrast to current paradigms, host genetic influences accounted for a  
49 surprising 29% of phenotypic variation in *Symbiodinium* communities in the  
50 horizontally-transmitting *A. tenuis*, but only 62% in the vertically-transmitting *M.*  
51 *digitata*. Our results reveal hitherto unknown flexibility in the acquisition of  
52 *Symbiodinium* communities and substantial heritability in both species, providing  
53 material for selection to produce partnerships that are locally adapted to changing  
54 environmental conditions.

## 55 **Introduction**

56 Coral bleaching, defined as either the loss of *Symbiodinium* cells from coral tissues or  
57 reduction in symbiont photosynthetic pigments, represents a threat to coral reefs world-wide  
58 as it increases in both frequency and magnitude<sup>1-4</sup>. If coral reefs are to persist under climate  
59 change, corals must either disperse to new unaffected habitats, acclimate through phenotypic  
60 plasticity, and/or adapt through evolutionary mechanisms<sup>5</sup>. However, the extent to which  
61 thermal tolerance can increase, either through changes to the host genome or *Symbiodinium*  
62 community hosted, or by direct selection on the symbionts themselves, is currently unclear.

63 Bleaching sensitivity is variable within and among species<sup>6</sup>, but comparative roles of  
64 host genetics versus symbiont communities to this variation remain unclear<sup>7,8</sup>. The  
65 *Symbiodinium* community hosted by corals has long been recognized as the primary factor  
66 determining bleaching susceptibility<sup>8,9</sup>. However, host influences are also evident<sup>10-12</sup> and  
67 may play an equally important role in determining bleaching susceptibility. Endosymbiotic  
68 communities could influence host adaptation to changing climates through increased host  
69 niche expansion<sup>13,14</sup>, but a major impediment to understanding the capacity of corals to adapt  
70 to a changing climate is lack of knowledge about the extent to which *Symbiodinium*  
71 communities associated with corals are inherited and hence subject to selection.

72 There are nine recognized *Symbiodinium* clades<sup>15</sup> that encompass substantial  
73 sequence and functional variation at the intra-clade (type) level (reviewed in<sup>16</sup>). Traditional  
74 technologies used in the field have generally overlooked taxonomic resolution at the type  
75 level, leading to many studies comparing *Symbiodinium* communities at the clade and  
76 dominant abundance level, although this trend is changing<sup>17,18</sup>. Deep sequencing  
77 technologies currently available can detect type level diversity even at low abundances<sup>19</sup> and  
78 are now being applied to understand adult coral-*Symbiodinium* diversity<sup>20-22</sup>, but have not  
79 yet been applied to the early life-history stages of corals. Therefore, there are gaps in our  
80 basic knowledge of the composition of *Symbiodinium* communities at lower, functionally  
81 relevant taxonomic levels, particularly community members at background abundances, and  
82 in the eggs and juveniles of corals.

83 Natural variation in the composition of coral-associated *Symbiodinium* communities  
84 exists among coral populations and species<sup>16,23</sup>, with certain communities offering greater  
85 bleaching resistance compared to others<sup>24,25</sup>. It is not yet known what enhances or constrains  
86 the capacity of corals to harbour stress-tolerant *Symbiodinium* types and whether changes in  
87 *Symbiodinium* communities in response to environmental stressors are stochastic or  
88 deterministic<sup>26</sup>. Given the importance of *Symbiodinium* communities for bleaching

89 susceptibility and mortality of the coral holobiont<sup>27,28</sup>, quantifying the proportional  
90 contributions of genetic and environmental factors to community formation, regulation and  
91 stress tolerance is important for understanding coral health. If the *Symbiodinium* community  
92 is heritable, changes to these communities may bring about adaptation of the holobiont as a  
93 whole. Under this scenario, *Symbiodinium* community shifts are equivalent to changes in host  
94 allele frequencies, thus opening up new avenues for natural and artificial selection, assisted  
95 evolution and microbiome engineering<sup>26,29</sup>.

96 *Symbiodinium* communities associated with scleractinian corals are either acquired  
97 from the environment (horizontal transfer) or passed maternally from adults to eggs or larvae  
98 (vertical transfer). Approximately 85% of scleractinian coral species broadcast spawn eggs  
99 and sperm into the environment, and of these, ~80% acquire symbionts horizontally; the  
100 remaining ~20% acquire them vertically<sup>30</sup>. Vertically-transmitted symbiont communities are  
101 predominantly found in brooding corals with internal fertilization<sup>30</sup> and are theorized to be of  
102 lower diversity and higher fidelity<sup>16</sup>. Conversely, horizontal transmission has generally been  
103 assumed to result in weaker fidelity that can be increased through the development of strong  
104 genotype associations between hosts and their symbiont community<sup>31</sup>. Studies specifically  
105 quantifying the genetic component governing *Symbiodinium* communities established in  
106 offspring of both horizontal and vertical transmitters are needed to elucidate the potential for  
107 adaptation through symbiont community changes.

108 Heritability describes the genetic components of variability in a trait using analysis of  
109 co-variance among individuals with different relatedness<sup>32</sup>. The ratio of additive genetic  
110 variance to phenotypic variance ( $V_A/V_P$ ) is defined as narrow-sense heritability ( $h^2$ )<sup>33</sup>. The  
111 degree of heritability of a trait ranges from 0 - 1, and describes the influence of parental  
112 genetics on the variability of that trait<sup>33</sup>. Therefore, the degree to which traits might change  
113 from one generation to the next can be predicted from measures of heritability, where the  
114 predicted change in offspring phenotype is proportional to  $h^2$  (i.e., the breeder's equation)<sup>34</sup>.  
115 It is particularly important to determine the genetic contribution to understand the potential  
116 for adaptation and to predict the strength of response to selection (i.e, the 'evolvability' of a  
117 trait)<sup>5,35,36</sup>.

118 To quantify the potential for selection of endosymbiotic *Symbiodinium* communities  
119 associated with broadcast spawning corals in response to changes in environmental  
120 conditions (i.e., climate change-induced), we characterized symbiont communities associated  
121 with adults and juveniles of the horizontal transmitter *Acropora tenuis* and with adults and  
122 eggs of the vertical transmitter *Montipora digitata* using high-throughput sequencing. Using a

123 community diversity metric, we derived the narrow-sense heritability ( $h^2$ ) of these  
124 communities and identified new and unique *Symbiodinium* types recovered from juveniles  
125 and eggs compared to their parental colonies. Finally, we described previously unknown  
126 *Symbiodinium* community dynamics in the early life-history stages of these two common  
127 coral species.

128

## 129 **Results**

### 130 ***Symbiodinium* communities associated with *Acropora tenuis***

131 After one month in the field, there were similarities at the clade level between  
132 *Symbiodinium* communities associated with the 2012 and 2013 families of *A. tenuis* juveniles,  
133 with 54 OTUs (17.1%) shared between the two years, including similar proportions of OTUs  
134 retrieved across the clades in each year (Fig. 1, Supplementary Table S4). In both years, the  
135 majority of OTUs were recovered from three clades (A, C, and D) and the number of OTUs  
136 from each of these clades was similar between years (Supplementary Table S4). The greatest  
137 diversity of OTUs found in juveniles from both years belonged to C1, A3 and “uncultured”  
138 types (see methods for definitions of OTUs), and a diversity of different OTUs within types  
139 A13, A-type CCMP828, D1 and D1a were also present (Supplementary Fig. S1). The  
140 predominant patterns characterising *Symbiodinium* communities associated with the 2012 and  
141 2013 families were the high abundance of *Symbiodinium* types A3, C1, D1, and CCMP828,  
142 and the comparatively lower abundance of D1a (Fig. 2). However, substantial variation in  
143 *Symbiodinium* diversity and abundance existed among juveniles within the same family, as  
144 well as among families of juveniles (Supplementary Results, Fig. 2). For example, juvenile  
145 families differed in their average OTU diversity and abundance, as well as their taxonomic  
146 composition (additional description in Supplementary Results, Fig. 2, Supplementary Table  
147 S5), where particular families contained juveniles of particularly high diversity (families F14  
148 and F18).

149 Juveniles from both years harboured more unique OTUs than adults (juveniles vs.  
150 adults: 111 vs. 2 (2012), 151 vs. 2 (2013)), with comparatively few OTUs shared between life  
151 stages (21 shared in 2012 (out of 422 OTUs); 28 shared in 2013 (out of 568 OTUs)) (Fig. 1).  
152 Furthermore, the majority of OTUs in both years were at background abundances (Fig. 1).  
153 The majority of OTUs were also rare (112 - 172 OTUs found in less than 25% of samples in  
154 2012 and 2013), whilst 4 - 16 OTUs were common (25 - 75% of samples) and 5 - 6 OTUs  
155 were core members (two A3 types, CCMP828, C1, D1, D1a were present in greater than 75%  
156 of samples) (Fig. 1).

157

158 ***Symbiodinium* communities associated with *Montipora digitata***

159 101 OTUs were found in *M. digitata* eggs and adults, with 7 ( $\pm 0.9$  SE) OTUs per egg  
160 and 5.3 ( $\pm 0.9$  SE) OTUs per adult, on average. The highest diversities of OTUs were  
161 retrieved from clades A (73 OTUs) and C (18 OTUs), whereas D had three OTUs represented  
162 (Fig. 3). 99.1% of the total cleaned reads belonged to C15 (OTU1), with this type making up  
163 98.8 % ( $\pm 0.5$  SE) and 99 % ( $\pm 0.1$  SE) of all reads retrieved from dams and eggs, respectively.  
164 The next most abundant OTUs were C1, D1, and A3 (Fig. 4). Adults could generally be  
165 distinguished from eggs by the unique presence of A2, A3, particular C1 and A3 variants  
166 (C1\_8, HA3-5), G3 (Fig. 3), and a greater proportional abundance of an A type symbiont  
167 (OTU4) in dams 29, 32, 7, 8 and 9 (Fig. 4). Of these unique adult OTUs, none were found in  
168 more than two adult colonies. Eighty-two OTUs were found in eggs but not adults and 43 of  
169 these were found in three or more eggs, and a majority were “uncultured” types at  
170 background levels from the eggs of dam 29 (Fig. 3). Both inter- and intra- family variation in  
171 background *Symbiodinium* OTU composition and abundance were detected within eggs as  
172 well (further description in Supplementary Results, Supplementary Fig. S2, Supplementary  
173 Table S6).

174

175 **Narrow-sense heritability of *Symbiodinium* community in *A. tenuis* juveniles and *M.***  
176 ***digitata* eggs**

177 Bayesian linear mixed models, and specifically, the animal model, were used to  
178 estimate relatedness-based heritability as they are robust to unbalanced designs. Furthermore,  
179 the animal model utilizes all levels of relatedness between individuals in a given dataset, and  
180 not just parent-offspring comparisons<sup>37</sup>. The Bayesian narrow-sense heritability estimate ( $h^2$ )  
181 of the initial *Symbiodinium* community in *A. tenuis* juveniles was 0.29, with a 95% Bayesian  
182 credibility interval for the additive genetic component of 0.06-0.86. The mean heritability  
183 was 0.36 ( $\pm 0.21$  SD) (Fig. 5). The high density of estimates between 0.2 - 0.4 within the  
184 posterior distribution of  $h^2$  suggests high statistical support around 0.29, despite the  
185 credibility interval being very large. The maternal transfer of *Symbiodinium* in the broadcast  
186 spawning coral *M. digitata* had a narrow-sense heritability estimate of 0.62 (0.27-0.86 95%  
187 Bayesian credibility interval), with a mean heritability of 0.57 ( $\pm 0.16$  SD) (Fig. 5). We did  
188 not detect an effect of maternal environment on similarities in *Symbiodinium* diversity among  
189 eggs or among juveniles. Models that included maternal effects arising from eggs developing  
190 in a shared environment (maternal environmental effects for both *A. tenuis* and *M. digitata*)

191 were not significantly better than those that did not include maternal effects (DIC no effects <  
192 DIC maternal environmental effects included).

193 Mid-parent regression estimates for the 29 *A. tenuis* families from 2012 and 2013  
194 indicated that trait-based  $h^2$  of the *Symbiodinium* community was 0.3 (Supplementary Fig.  
195 S3). Parent-offspring regression of the 99 *M. digitata* eggs genotyped from nine dams  
196 resulted in a heritability estimate of 0.16 (slope= 0.078 x 2 as a single parent) (Supplementary  
197 Fig. S4). Therefore, 30% and 16% of the measured variation in the *Symbiodinium* community  
198 in *A. tenuis* and *M. digitata*, respectively, was due to genetic differences among offspring.

199

#### 200 **Impact of intragenomic variation on heritability analysis:**

201 Simulating intragenomic variants in the *M. digitata* dataset yielded five intragenomic  
202 variant groups from clade A (IGV1\_A: OTU\_65/74/113/123/121; IGV2\_A: 29/23/133;  
203 IGV3\_A: 68/32; IGV4\_A:61/70; IGV5\_A: 56/75), and one from clade C (IGV6\_C: 128/42).  
204 OTUs from clade D were not highly similar and correlation coefficients for the three clade F  
205 OTUs had relatively low correlation coefficients (0.3-0.6). The diversity metric and Bayesian  
206 MCMC heritability was re-calculated with these 16 OTUs collapsed into their respective six  
207 intragenomic variants. The resulting  $h^2$  estimate was slightly higher ( $0.5754 \pm 0.157$  compared  
208 to the original estimate of  $0.5722 \pm 0.157$ ).

209

#### 210 **Discussion**

211 Substantial heritability of the initial *Symbiodinium* community in early life history  
212 stages of both vertically- and horizontally-transmitting corals highlights the important role of  
213 host genetics in governing the composition of symbiont communities within their tissues.  
214 Surprisingly, mean Bayesian heritability estimates for initial *Symbiodinium* communities  
215 associated with juveniles of *Acropora tenuis* were moderate (0.29), but higher than expected  
216 given low levels of fidelity assumed for species with environmentally-acquired symbionts.  
217 Conversely, heritability estimates associated with eggs of *Montipora digitata* were high  
218 (0.62), but lower than expected given the high levels of fidelity expected for vertically-  
219 transmitted symbionts. Given that heritability is a quantifiable measure of the influence of  
220 genes compared to environmental factors in shaping phenotypes, both non-zero heritability  
221 estimates confirm that genes do influence the structuring of *Symbiodinium* communities in  
222 these two coral species. Although our results differ from expectations of fidelity and  
223 heritability based on current transmission paradigms in corals, they are consistent with  
224 studies that have demonstrated the role of host genetics in governing the composition of



225 symbiotic bacterial communities in mammals, insects and other cnidarians<sup>38-41</sup>, as well as the  
226 abundance of bacteria in insects<sup>42</sup> and humans<sup>43</sup>. Furthermore, these estimates are consistent  
227 with the characteristic hallmarks of host-controlled symbiont regulation. For example,  
228 *Symbiodinium* cells are enveloped in a host-derived symbiosome, with only a few (2-8)  
229 symbiont cells per host membrane<sup>44</sup>. This suggests that the coral host may regulate  
230 *Symbiodinium* on an almost individual cell basis, facilitating overall population regulation<sup>42</sup>  
231 and potentially community composition within the holobiont. Thus, it is likely advantageous  
232 for the host's molecular architecture governing the *Symbiodinium* community to be passed  
233 from one generation to the next. Importantly, the partial genetic regulation of *Symbiodinium*  
234 communities found here suggests that there is potential for the symbioses to evolve and  
235 adapt, and therefore to potentially develop 'optimal' symbiont-host partnerships under  
236 changing environmental conditions.

237 Our results provide the first in-depth picture of the complexity of the *Symbiodinium*  
238 community in *A. tenuis* juveniles during the initial month of uptake. No juveniles exclusively  
239 hosted a single clade or type, a result corroborated by lab and other field-based experimental  
240 studies<sup>45-50</sup>. Moreover, although the diversity measured here was much greater than values  
241 reported in previous studies, we found temporal stability in cladal diversity and abundances  
242 between the two years. It is possible that the temporal stability detected at the clade level  
243 within juveniles was in part due to the stability of locally available symbionts, either from the  
244 sediments or from the continual seeding of symbionts into local environments by resident  
245 symbiont-bearing cnidarians<sup>51</sup>. Such environmental variance is partitioned in the MCMC  
246 animal model (along with genetic effects due to relatedness) and hence accounted for in  
247 heritability estimates. Therefore, stability in the availability of environmental *Symbiodinium*  
248 and its subsequent impact on temporal stability of coral-associated *Symbiodinium*  
249 communities would be accounted for in heritability estimates. The unexpectedly high fidelity  
250 of the symbiont community, in conjunction with our heritability estimates, suggest strong  
251 host genetic – symbiont community associations, a result also implicated in studies  
252 comparing symbiosis fidelity across phylogenetic associations in *Hydra*, wasps, and primates  
253<sup>31</sup>. Further work is needed to document *Symbiodinium* diversity in juveniles of broadcast  
254 spawning corals, as well as to elucidate molecular mechanisms regulating the establishment  
255 of this symbiosis.

256 Our conclusion of active host regulation based on heritability estimates, coupled with  
257 temporal stability in the relative proportions and numbers of OTUs within clades at principal  
258 and background levels between years, suggest that genetic regulation governing



259 *Symbiodinium* communities extends to clades found at very low abundance. The roles of  
260 many background *Symbiodinium* types remain unclear and may be minor compared to  
261 principal types like A3, C1, and D1 when corals are healthy. However, *Symbiodinium* at  
262 background abundances can be important for coral health under sub-optimal environmental  
263 conditions. For example, fine scale dynamics of *Symbiodinium* communities (i.e., changes in  
264 relative abundance and/or diversity of only a fraction of types) impact host bleaching  
265 susceptibility, recovery and physiology<sup>25,28,52,53</sup>. Growing evidence suggests that background  
266 types are important in several *Symbiodinium*-coral symbioses during recovery from stress  
267 (i.e. *Acropora millepora* and D-types<sup>25</sup>, *Agaricia* spp., *M. annularis*, *M. cavernosa*-D1a<sup>52,54</sup>,  
268 *Pocillopora damicornis*, *Stylophora pistilata*-C\_I:53<sup>21</sup>), but may not be relevant for all (i.e.  
269 *Acropora japonica*- and *S. voratum*<sup>55</sup>). A strong functional role of background *Symbiodinium*  
270 types would not be surprising given the functional importance of background bacterial  
271 lineages recently described for corals<sup>56,57</sup>, but remains to be conclusively established for  
272 many coral-*Symbiodinium* associations.

273         The heritability signal derived from Bayesian models found for *Symbiodinium*  
274 communities associated with eggs of the vertically-transmitting coral *M. digitata* was  
275 predictably strong (62%) given that the dominant C15 OTU was harboured in adults and eggs  
276 at very high abundances. However, fidelity was less than expected given that eggs acquire  
277 *Symbiodinium* communities in the maternal environment. This lower than expected  
278 heritability signal is mirrored when the likenesses between dams and eggs are compared. For  
279 example, despite *Symbiodinium* C15 dominating symbiont communities in both eggs and  
280 dams, maternal transfer lacked precision in one dam in particular (dam 29), whose eggs had  
281 highly variable *Symbiodinium* communities that included “uncultured” OTUs, similar to  
282 previous reports for another species in this genus<sup>58</sup>. There are many precedents for inexact  
283 maternal transfer of symbiont communities, and studies on insects show that vertical  
284 transmission is rarely perfect<sup>59</sup> due to symbiont competition within hosts<sup>60</sup>. Such  
285 imprecision in maternal transfer is a product of fitness costs associated with the maintenance  
286 of superinfections (stable coexistence of multiple symbionts) and can be overcome if  
287 selection for coexistence is greater than costs associated with their maintenance<sup>60</sup>.  
288 Superinfections may provide a diversity of beneficial symbiont traits. For example, different  
289 symbionts provide different nutrients to host insects<sup>61</sup>. For *M. digitata*, imprecision may  
290 represent a bet-hedging strategy to maximise the likelihood that some offspring will survive  
291 when eggs are dispersed and encounter environments that are different to their parents.  
292 Although some of these background OTUs may represent random contaminants (i.e.

293 symbionts attached to the outside of eggs), a majority of OTUs were found in three or more  
294 independent egg samples, suggesting that they indeed represent relevant symbiont candidates.  
295 Although many of these background OTUs existed predominantly at less than 1% abundance  
296 in adults and eggs, it is feasible that these OTUs may grow in abundance to become dominant  
297 members of the community if environmental conditions change<sup>52</sup>, as was found for C.28 and  
298 C\_I:53 in *P. damicornis*<sup>21</sup>. This variation highlights potential flexibility in the *M. digitata*-  
299 *Symbiodinium* symbiosis, which may enable the host to vary its symbiotic partnerships in  
300 response to environmental change by benefitting from new host-symbiont combinations.

301 Surprisingly, much of the diversity found in *M. digitata* eggs was not present in parent  
302 colonies, similar to results reported for larvae of the brooding, vertically-transmitting coral  
303 *Seriatopora hystrix* (Quigley et al. *in-review*) and observed here between *A. tenuis* juveniles  
304 and adults (this study). Our results suggest that eggs acquire symbionts from sources external  
305 to the maternal transmission process. Mixed systems involving both vertical and horizontal  
306 transmission are known (e.g. bacteria in clams; reviewed in<sup>31</sup>) and have recently been  
307 demonstrated in brooding corals (Quigley et al. *in-review*). Given that the cellular machinery  
308 needed for recognition of appropriate *Symbiodinium* types<sup>44</sup> would not be developed in egg  
309 cytoplasm, where *Symbiodinium* are present pre-fertilization<sup>62</sup>, eggs exposed to transient  
310 symbionts in the dam's gastrovascular cavity or by parasitic *Symbiodinium*-containing  
311 vectors (e.g. ciliates<sup>63</sup> and parasites<sup>60</sup>) may retain these communities until recognition  
312 systems of eggs, larvae or juveniles mature. Interestingly, one type (OTU111) found in three  
313 eggs from dam 29 was identified as a free-living A type recovered from Japanese marine  
314 sediments (EU106364<sup>64</sup>), supporting the hypothesis that such unique OTUs in eggs may  
315 represent non-symbiotic, potentially opportunistic symbionts. Further work is needed to  
316 determine what ecological roles these symbionts potentially fulfil and their systematic  
317 relationships. For example, a high number of "uncultured" types and inconsistencies between  
318 Genbank identities and phylogenetic placement of particular OTUs suggest considerable  
319 taxonomic uncertainty. Indeed, the non-clustered placement of OTUs with similar Blast  
320 designations across the dendrograms suggests that a potential revision of particular Genbank  
321 accessions may be needed, as has been observed for clade E *Symbiodinium* (see discussion in  
322<sup>65</sup>).

323 Maternal environmental effects, such as lipid contributions by dams, have well known  
324 effects on the early life stages of many marine organisms<sup>66</sup>. However, our Bayesian models  
325 were not significantly improved by the addition of dam identity, suggesting that significant  
326 heritability estimates are attributable to genetic effects and not due to maternal environmental

327 effects<sup>37</sup> or cytoplasmic inheritance<sup>67</sup>. Whilst we can only speculate about the exact  
328 mechanisms that are being inherited by offspring, likely candidates include those involved in  
329 recognition and immunity pathways<sup>44</sup>, with cell-surface proteins playing an important role in  
330 the selection of specific *Symbiodinium* strains by coral hosts<sup>68-70</sup>. For example, these may  
331 include Tachylectin-2-like lectins, which have been implicated in the acquisition of A3 and a  
332 D-type in *A. tenuis*<sup>45,71,72</sup>. Indeed, suppression or modification of the immune response has  
333 often been implicated in the formation of *Symbiodinium*-cnidarian partnerships<sup>44,73,74</sup>.

334 Although this has not yet been demonstrated in corals, human studies have shown that  
335 immune system characteristics underpin heritable components of the genome<sup>75</sup> and at least  
336 151 heritable immunity traits have been characterized, including 22 cell-surface proteins<sup>76</sup>.

337 Juvenile corals may be primed to take up specific *Symbiodinium* types through the  
338 transfer of genetic machinery that results in a by-product(s) that ensures juveniles are  
339 colonized by beneficial types and prevents colonization by unfavourable symbionts through  
340 competitive exclusion (e.g., maternal imprinting controlled by offspring loci<sup>67</sup>). Such by-  
341 products may be akin to amino acids, which have been shown to regulate the abundances of  
342 *Symbiodinium* populations<sup>77</sup>. Sugars have also been found to influence bacterial communities  
343 in corals<sup>78</sup> and may have similar roles in regulating *Symbiodinium* communities. Trehalose,  
344 in particular, has been identified as an important chemical attractant between *Symbiodinium*  
345 and coral larvae and may help to regulate the early stages of symbiosis<sup>79</sup>. Human studies also  
346 provide examples of sugars (both maternal and offspring derived) that make infant intestines  
347 less habitable for harmful bacteria, setting up conditions for preferential colonization by  
348 favourable bacteria<sup>80</sup>. Bacterial diversity in cnidarian hosts can also be modulated through  
349 the production of antimicrobial peptides<sup>38</sup> and bacterial quorum sensing behaviour<sup>81</sup>.

350 Although neither of these mechanisms has been explored with respect to the regulation of  
351 *Symbiodinium* in corals, similar host/symbiont by-products may be influential in the  
352 regulation of *Symbiodinium* communities.

353 Heritability estimates based on parent-offspring regression and Bayesian MCMC  
354 methods were similar in *A. tenuis* but not in *M. digitata*. Differences between the estimates of  
355 these two methods for *M. digitata* may be due to the purely maternal basis of inheritance in  
356 this species, with the slope of parent-offspring regressions potentially more accurate for traits  
357 that are transmitted following sexual reproduction involving two parents. Alternatively,  
358 Bayesian MCMC methods, which do not rely on phenotypic information of parents, and  
359 instead only utilize information on relatedness among offspring and co-variances between  
360 them in the phenotypic trait being measured, may be more robust to a variety of different

361 reproductive modes across organisms. Furthermore, outplanting juveniles to only one  
362 location may have introduced bias into the regression-based estimates, causing juveniles and  
363 adults from the OI location to appear more similar, potentially because they were exposed to  
364 similar environmental pools of symbionts, compared to juveniles from PCB parents.  
365 However, concordance between Bayesian (which do not rely on parental phenotypic  
366 information) and regression-based estimates suggests that this bias is negligible. Standard  
367 errors calculated in heritability studies are normally large<sup>5</sup> but Bayesian MCMC methods are  
368 robust, as they allow for estimation of heritability and statistical support of that estimate  
369 directly from posterior distributions. Therefore, although credibility intervals calculated were  
370 large, high densities of posterior distributions around our heritability estimates signify that  
371 these values are the most probable compared to values at lower posterior densities. This  
372 Bayesian method for determining uncertainty is robust, especially compared to frequentist  
373 methods where standard errors are approximate<sup>5</sup>.

374 In conclusion, results presented here provide new insights into the role of host  
375 genetics and inheritance in governing *Symbiodinium* communities in corals. This information  
376 is important for determining the potential for host-symbiont partnerships to evolve.  
377 Variability in the symbiont community within and among families and evidence that variation  
378 is heritable, as supported by the moderate to high heritability estimates found, corroborate the  
379 likelihood that adaptive change is possible in this important symbiotic community. These  
380 results may also aid in the development of active reef restoration methods focused on assisted  
381 evolution of hosts and symbionts, in which targeted traits with moderate to high heritability  
382 increase the efficacy of breeding schemes. Adaptive change through heritable variation of  
383 symbionts is therefore another mechanism that corals may use to contend with current and  
384 future stressors, such as climate change.

385

## 386 **Materials and Methods**

### 387 **Experimental breeding design and sample collection**

388 For crossing experiments, gravid colonies of the horizontally-transmitting broadcast-  
389 spawning coral *Acropora tenuis* were collected in 2012 and 2013 from the northern (Princess  
390 Charlotte Bay (PCB): 13°46'44.544"S, 143°38'26.0154"E) and central Great Barrier Reef  
391 (GBR) (Orpheus Island: 18°39'49.62"S, 146°29'47.26"E).

392 In 2012, nine families of larvae were produced by crossing gametes from four corals  
393 (OI: A-B, PCB: C-D) on 2 December following published methods<sup>82</sup>. The nine gamete  
394 crosses excluded self-crosses (Supplementary Table S1). Larvae were stocked at a density of

395 0.5 larvae per ml in one static culture vessel per family in a temperature-controlled room set  
396 at 27°C (ambient seawater temperature). Water was changed one day after fertilization and  
397 every two days thereafter with 1 µM filtered seawater at ambient temperature. To induce  
398 settlement, 25 settlement surfaces (colour-coded glass slides) were added to each larval  
399 culture vessel six days post-fertilization, along with chips of ground and autoclaved crustose  
400 coralline algae (CCA, *Porolithon onkodes* collected from SE Pelorus: 18°33'34.87"S,  
401 146°30'4.87"E). The number of settled juveniles was quantified for each family, and then  
402 placed randomly within and among the three slide racks sealed with gutter guard mesh. The  
403 racks were affixed to star pickets above the sediments in Little Pioneer Bay (18°36'06.2"S,  
404 146°29'19.1"E) 11 days post fertilization. Slide racks were collected 29 days later (11  
405 January 2013), after which natural infection by *Symbiodinium* was confirmed with light  
406 microscopy. Juveniles from each cross were sampled (n = 6 - 240 juveniles/family,  
407 depending on survival rates), fixed in 100% ethanol and stored at -20°C.

408 In 2013, 25 families were produced from gamete crosses among eight parental  
409 colonies: four from PCB and four from Orpheus Island (full details of colony collection,  
410 spawning, crossing and juvenile rearing in <sup>82</sup> (Supplementary Table S2). Larvae were raised  
411 in three replicate cultures per family. Settlement was induced by placing autoclaved chips of  
412 CCA onto settlement surfaces, which were either glass slides, calcium carbonate plugs or the  
413 bottom of the plastic culturing vessel. Settlement surfaces with attached juveniles were  
414 deployed randomly, 19 days post fertilization, at the same location in Little Pioneer Bay as in  
415 2012, and collected 26 days later. Samples of juveniles (n = 1 - 194 juveniles per family)  
416 were preserved and stored as in 2012.

417 Thirty-two gravid colonies of the vertically-transmitting broadcast spawner  
418 *Montipora digitata* were collected from Hazard Bay (S18°38.069', E146°29.781') and  
419 Pioneer Bay (S18°36.625', E146°29.430') at Orpheus Island on the 30<sup>th</sup> of March and 1<sup>st</sup> of  
420 April 2015. Colonies were placed in constant-flow, 0.5 µM filtered seawater in outdoor  
421 raceways at Orpheus Island Research Station. Egg-sperm bundles were collected from a total  
422 of nine colonies on the 4<sup>th</sup> and 5<sup>th</sup> of April, separated with a 100 µm mesh and rinsed three  
423 times. Individual eggs and adult tissue samples were then placed in 100% ethanol and stored  
424 at -20°C until processing.

425

#### 426 **Sequencing of *Symbiodinium* ITS-2 in egg, juvenile and adult coral samples**

427 The number of juveniles of *A. tenuis* sequenced from each of the 9 crosses in 2012  
428 ranged from 2 - 29 individuals (average ± SE: 11.3 ± 3) (Supplementary Table S1) and a

429 single sample from each parental colony was sequenced concurrently. In 2013, 1 - 21 *A.*  
430 *tenuis* juveniles (average  $\pm$  SE:  $8.6 \pm 1$ ) were sequenced from each of the 20 families (of the  
431 original 25) that survived field deployment (Supplementary Table S2). The adult samples  
432 sequenced included three samples per colony from Orpheus parents (from the edges and  
433 center of each colony) and one sample per colony for Princess Charlotte Bay parents. For *M.*  
434 *digitata*, 5 - 12 eggs per dam were sequenced, along with one sample per maternal colony.

435 DNA was extracted from juveniles of *A.tenuis* in 2012 and 2013 with a SDS method  
436 <sup>82</sup>. For *M. digitata*, single egg extractions used the same extraction buffers and bead beating  
437 steps as described in <sup>82</sup>, although without the subsequent washes and precipitation steps  
438 because of the small tissue volumes of single eggs <sup>83</sup>. Library preparation, sequencing and  
439 data analysis were performed separately for 2012 and 2013 samples of *A. tenuis* and *M.*  
440 *digitata*, as described in <sup>82</sup>. Briefly, the USEARCH pipeline (v. 7) <sup>84</sup> and custom-built  
441 database of all *Symbiodinium*-specific NCBI sequences were used to classify reads <sup>85,86</sup>, with  
442 blast hits above an E-value threshold of 0.001 removed, as they likely represented non-  
443 specific amplification of other closely-related species within the Dinoflagellata phylum  
444 (Supplementary Table S3). Cleaned reads were clustered with the default 97% identity and  
445 minimum cluster size of 2 (thus eliminating all singleton reads), after which all reads were  
446 globally aligned to 99% similarity with gaps counted as nucleotide differences.

447 OTUs likely represent specific *Symbiodinium* genotypes, whilst subtypes represent  
448 strains and types represent species respectively. This OTU-based framework infers  
449 delineations between the OTU, subtype, and type levels <sup>20,87</sup>. Multiple OTUs may therefore  
450 map to known types, <sup>20</sup> and some OTUs may represent intragenomic variants <sup>10,19,20</sup>.  
451 *Symbiodinium* OTUs listed as “uncultured” were assigned this term based on their Genbank  
452 NCBI identifiers, following verbatim the name given by the original depositors of these  
453 sequences. Quotes around the term were added to make clear that this is not a functional  
454 description or taxonomic designation. Analysis of rarefaction curves suggested that  
455 differences in sequencing depth across samples did not affect diversity estimates (additional  
456 description in Supplementary Methods).

457

## 458 **Data analysis and visualization**

459 Fan dendrograms were constructed using a raw alignment function and neighbour  
460 joining tree algorithm from the ‘ape’ package <sup>88</sup>. Sample metadata were mapped onto trees  
461 using the package ‘diverstreet’ <sup>89</sup>. To aid in visualizing the phylogenetic relationships on the  
462 *A. tenuis* tree, only OTUs that were found within at least three samples were kept, reducing



463 the total OTU count from 422 to 134 for 2012 samples and from 568 to 181 for 2013  
464 samples, giving an overall total of 315 OTUs for *A. tenuis*. To determine the overlap in  
465 *Symbiodinium* OTUs from *A. tenuis* data between years that were clustered and mapped  
466 separately, the 315 OTUs were aligned in Clustal OMEGA<sup>90</sup>. OTUs that clustered and  
467 blasted to the same accession number (54 of the 315) were deemed to be the same OTU,  
468 resulting in a total of 261 distinct OTUs. In total, 80 unique OTUs were found in 2012, 127  
469 were found in 2013, and 54 were shared between years. OTUs with a relative normalized  
470 abundance of less than 0.01% were classified as “background”, whilst those with abundances  
471 greater than 0.01% were considered “principal.” Rare, background types can play an  
472 important role in recovery post-bleaching caused by both low and high temperatures by  
473 becoming dominant symbionts<sup>52</sup>. The cut-off of 0.01% chosen to designate background  
474 abundances here is commonly used in microbial, deep sequencing studies examining rare  
475 taxa<sup>91-93</sup>, and has been found to fall within the detection limits of deep sequencing for  
476 *Symbiodinium*<sup>19</sup>. Furthermore, 0.01% represents approximately 100-200 cells per square cm  
477<sup>94</sup>, a density of symbionts that has been recognised as ecologically relevant. For example, a  
478 survey of four coral species on the GBR revealed clade D populations existed, on average, at  
479 levels of 100-10,000 cells per cm<sup>2</sup><sup>95</sup>. This study is also the first to use deep sequencing to  
480 identify *Symbiodinium* communities in eggs and juveniles of corals, and therefore this lower  
481 threshold enabled the inclusion of a greater percentage of *Symbiodinium* communities with  
482 which to explore the diversity present in this life stage. OTUs were further classified by  
483 ubiquity across samples, whereby “core” OTUs were defined as those found in >75% of  
484 samples, “common” were found in 25 -75% of samples, and “rare” were found in < 25%. As  
485 far fewer OTUs were recovered from *M. digitata* samples, all 101 OTUs from the one year  
486 sampled were used to visualize and classify them by abundance and ubiquity, as described  
487 above. Differential abundance testing was performed with ‘DESeq2’, with Benjamini-  
488 Hochberg p-adjusted values at 0.05<sup>96-98</sup>. Networks and heatmaps were constructed using un-  
489 weighted Unifrac distances of the normalized *Symbiodinium* abundances in eggs only, where  
490 maximum distances were set at 0.4.

491

## 492 **Heritability analyses**

493 The *Symbiodinium* community associated with each adult, juvenile (*A. tenuis*) or egg  
494 (*M. digitata*) of the two coral species was characterized as a continuous quantitative trait of  
495 the host by converting community composition into a single diversity metric. Differences  
496 among juveniles in regards to their *Symbiodinium* communities were examined as a host



497 phenotypic trait. Collapsing complex assemblage data into a single diversity value (local  
498 diversity measure)<sup>99</sup> was necessary to apply a univariate heritability statistic. Such single  
499 diversity metrics have been used to explore the impact of host-genetic variation on bacterial  
500 symbiont populations residing within hosts across a range of environments in the adult and  
501 infant human body<sup>41,43</sup> as well as in insects<sup>42</sup>. The Leinster and Cobbold diversity metric (D)  
502 incorporates variance-normalized OTU abundances from linear models using negative  
503 binomial distributions, OTU sequence diversity, and OTU rarity in the following equation<sup>99</sup>:

$$504 \quad {}^qD_{ij}^Z(p),$$

505 where “q” is a measure of the relative importance of rare species from 0 (very important) to  
506  $\infty$  (not important), and Z is a matrix of genetic similarities of OTUs i through j. Pairwise  
507 percent similarities between OTUs sequences were calculated in ‘Ape’ with a “raw” model of  
508 molecular evolution, in which the simple proportion of differing nucleotides between  
509 pairwise comparisons is calculated and no assumption is made regarding the probability of  
510 certain nucleotide changes over others. Finally, P is a matrix of normalized abundances  
511 corresponding to each sample and OTU. Incorporating both abundance and diversity of  
512 *Symbiodinium* types into heritability estimates is essential because changes in *Symbiodinium*  
513 community abundance dynamics can change the functional output of the symbiosis as a  
514 whole<sup>28</sup> and are important in determining coral resilience and bleaching susceptibility  
515<sup>27,100,101</sup>. Model inputs therefore take into account which OTUs were present or absent in each  
516 sample, OTU sequence diversity, and the abundance of each OTU.

517 Heritability estimates for both species presented here represent the initial  
518 *Symbiodinium* community with the time of sampling consistent with complete infection (i.e.  
519 defined by the presence of *Symbiodinium* throughout the polyp) of *A. tenuis* juveniles (19 -  
520 22.5 days, personal observation,<sup>50,102</sup>). Calculated heritability may vary among traits and  
521 throughout ontogeny (i.e. with body size<sup>103</sup>) and hence we therefore make no predictions  
522 about the heritability of *Symbiodinium* communities at later ontogenic stages. However, as  
523 the early *Symbiodinium* community can influence juvenile survival<sup>82</sup> and because we do not  
524 yet know how the earliest communities impact later ones, evaluating the heritability at this  
525 initial stage is a logical first step.

526 Two methods were used to assess heritability. Bayesian methods are powerful tools  
527 for assessing heritability of natural (i.e. non-lab, non-model) populations and for non-  
528 Gaussian traits (see<sup>5</sup> for a full discussion of the advantages of using Bayesian inference in  
529 quantitative genetics). However, parent-offspring regressions were also calculated to  
530 facilitate comparisons with previous studies as they make up a majority of estimates available

531 in the literature. The correspondence in heritability estimates between these two methods is  
532 well-established (e.g.  $h^2=0.51$  vs  $0.52$  for *Drosophila melanogaster* traits<sup>33,104</sup>), although  
533 Bayesian MCMC estimates are generally lower<sup>5</sup> and confidence intervals around mean  
534 estimates generally smaller, especially at low levels of heritability<sup>105</sup>. Importantly, neither  
535 method is dependent on the known relatedness of the parents and instead rely on relatedness  
536 between the juveniles themselves (sib analysis comprised of full and half sibs) or  
537 comparisons between juveniles and adult phenotypes (parent-offspring regressions)<sup>32</sup>.

538

539 **Regression-based estimates of heritability:** Phenotypic values of offspring can be regressed  
540 against parental midpoint (average) phenotypic values, with the slope being equal to the  
541 narrow-sense heritability of the trait of interest<sup>33,34</sup>. Parental midpoint values were calculated  
542 by taking the average of dam and sire *Symbiodinium* diversities for each family and then  
543 regressing these values against diversity values for the offspring of each family. Precision of  
544 the heritability estimate increases when parents vary substantially in the trait of interest<sup>33</sup>.  
545 Coral colonies dominated by a single or mixed *Symbiodinium* communities (C, D, C/D  
546 communities) can be considered biological extremes and ample evidence describes their  
547 contrasting physiological impacts on coral hosts (i.e., growth, bleaching) when associated  
548 with D versus C communities in particular<sup>28</sup>. Therefore, parental colonies selected for  
549 breeding were dominated by C1 (families W5, 10) or had mixed communities of C1/D1  
550 (W7), C1/D1/D1a (W11, PCB4, 6, 8, 9), or multiple A, C1 and D types (OI3, 4, 5, 6) (Fig.  
551 2b).

552

553 **Bayesian linear mixed model estimates of heritability:** Heritability estimates were derived  
554 from estimates of additive genetic variance calculated from the ‘animal model,’ a type of  
555 quantitative genetic mixed effects model incorporating fixed and random effects, and  
556 relatedness coefficients amongst individuals<sup>106</sup>. The animal model was implemented using  
557 Bayesian statistics with the package ‘MCMCglmm’<sup>107</sup>. The model incorporated the diversity  
558 metric calculated for each juvenile and the pedigree coefficient of relatedness as random  
559 effects. Bayesian heritability models were run with  $1.5 \times 10^6$  iterations, a thinning level of 800  
560 (*A. tenuis*) or 250 (*M. digitata*), and a burn-in of 10% of the total iterations. A non-  
561 informative flat prior specification was used, following an inverse gamma distribution<sup>37</sup>.  
562 Assumptions of chain mixing, normality of posterior distributions and autocorrelation were  
563 met. The posterior heritability was calculated by dividing the model variance attributed to  
564 relatedness by the sum of additive and residual variance. The impact of environmental

565 covariance ( $V_{EC}$ ) was reduced by randomly placing families within the outplant area<sup>33</sup>.  
566 Maternal environmental effects were assessed and were not significant for either *A. tenuis* or  
567 *M. digitata* based on Deviance Information Criteria (DIC) from Bayesian models<sup>37</sup>. The  
568 influence of different settlement surfaces for *A. tenuis* juveniles in 2013 was assessed using  
569 linear mixed models (fixed effect: substrate, random effect: family) in the ‘nlme’ package<sup>108</sup>  
570 using the first principal component extracted from PCoA plots and incorporating weighted  
571 Unifrac distances of normalized *Symbiodinium* abundances for juveniles. Model assumptions  
572 of homogeneity of variance, normality, and linearity were met. Substrate type did not  
573 significantly explain *Symbiodinium* community differences among samples (LME:  $F_{(4)} = 1.05$ ,  
574  $p = 0.38$ ).

575

576 **Impact of intragenomic variation on heritability analysis:** The multicopy nature of  
577 *Symbiodinium* genomes and the presence of intragenomic variants make taxonomic  
578 assignments for distinct *Symbiodinium* sequences difficult, however, advances have been  
579 made to name and elucidate the functional diversity within *Symbiodinium*<sup>109–112</sup>. Single base  
580 pair variations in key genetic regions (e.g., intragenomic spacer region-2 ITS-2) can be the  
581 sole difference between important taxonomic entities, for example, between a new thermally  
582 tolerant C3 type (*S. thermophilum*) and the ubiquitous C3 type<sup>113</sup>; which further highlights  
583 the need for sensitive methodologies. Whilst different methods have been used to incorporate  
584 intragenomic variation into *Symbiodinium* taxonomy designations (i.e. single cell sequencing  
585<sup>18</sup>, and pairwise correlations<sup>10,19,114</sup>), the combination of single-cell sequencing, gel-based  
586 methods and next generation sequencing suggest that clustering at 97 % sequence similarity  
587 (the cut-off used here), is sufficient to collapse *Symbiodinium* from clades A, B and C into  
588 type-level designations<sup>20</sup>.

589 Even without accounting for intragenomic variation using the 97% clustering  
590 threshold, heritability analysis should be impacted little by these pseudo-variants given that  
591 intragenomic variants are found within the same genome. These groups of variants would  
592 therefore be inherited together and do little to impact variance between individuals of  
593 different families (which are important for calculating heritability), causing the bias in a  
594 systematic manner. To test this, we employed a three-step approach previously used to  
595 classify intragenomic variants<sup>82</sup> to the *M. digitata* dataset. Initial groups of OTUs were  
596 chosen from those that clustered closely together on the dendrogram as they have higher per  
597 cent similarity relative to other sequences. Correlation coefficients for these groups of closely  
598 clustered OTUs were then calculated, and OTUs having highly positive or negative

599 correlations coefficients (-1 to -0.8, 0.8 to 1) were identified as candidate intragenomic  
600 variants. To test the impact of accounting for intragenomic variants on Bayesian heritability  
601 analysis, MCMC models were then re-run the same way as described above but now  
602 incorporating intragenomic variants into the new-derived diversity metric.

603

## 604 **References**

- 605 1. Hoegh-Guldberg, O. Climate change, coral bleaching and the future of the world's  
606 coral reefs. *Aust. J. Mar. Freshw. Res.* **50**, 839–866 (1999).
- 607 2. Eakin, C. M., Lough, J. M. & Heron, S. F. in *Coral bleaching* 41–67 (Springer, 2009).
- 608 3. Glynn, P. W. Coral reef bleaching: ecological perspectives. *Coral Reefs* **12**, 1–17  
609 (1993).
- 610 4. Normile, D. El Niño's warmth devastating reefs worldwide. *Science* (80 ). **352**, 15–16  
611 (2016).
- 612 5. Charmantier, A., Garant, D. & Kruuk, L. E. B. *Quantitative genetics in the wild*. (OUP  
613 Oxford, 2014).
- 614 6. Hughes, T. P. *et al.* Climate change, human impacts, and the resilience of coral reefs.  
615 *Science* (80). **301**, 929–933 (2003).
- 616 7. Brown, B. E., Le Tissier, M. D. A. & Bythell, J. C. Mechanisms of bleaching deduced  
617 from histological studies of reef corals sampled during a natural bleaching event. *Mar.*  
618 *Biol.* **122**, 655–663 (1995).
- 619 8. Baird, A. H., Bhagooli, R., Ralph, P. J. & Takahashi, S. Coral bleaching: the role of  
620 the host. *Trends Ecol. Evol.* **24**, 16–20 (2009).
- 621 9. Glynn, P. W., Mate, J. L., Baker, A. C. & Calderon, M. O. Coral bleaching and  
622 mortality in Panama and Ecuador during the 1997-1998 El Niño Southern Oscillation  
623 event: spatial/temporal patterns and comparisons with the 1982-1983 event. *Bull. Mar.*  
624 *Sci.* **69**, 79–109 (2001).
- 625 10. Kenkel, C. D. *et al.* Evidence for a host role in thermotolerance divergence between  
626 populations of the mustard hill coral (*Porites astreoides*) from different reef  
627 environments. *Mol. Ecol.* **22**, 4335–4348 (2013).
- 628 11. Hawkins, T. D., Krueger, T., Wilkinson, S. P., Fisher, P. L. & Davy, S. K. Antioxidant  
629 responses to heat and light stress differ with habitat in a common reef coral. *Coral*  
630 *Reefs* **34**, 1229–1241 (2015).
- 631 12. Krueger, T. *et al.* Differential coral bleaching—Contrasting the activity and response  
632 of enzymatic antioxidants in symbiotic partners under thermal stress. *Comp. Biochem.*

- 633 *Physiol. Part A Mol. Integr. Physiol.* **190**, 15–25 (2015).
- 634 13. Fellous, S., Duron, O. & Rousset, F. Adaptation due to symbionts and conflicts  
635 between heritable agents of biological information. *Nat. Rev. Genet.* **12**, 663 (2011).
- 636 14. LaJeunesse, T. C. *et al.* Host–symbiont recombination *versus* natural selection in the  
637 response of coral–dinoflagellate symbioses to environmental disturbance. *Proc. R. Soc.*  
638 *B Biol. Sci.* **277**, 2925–2934 (2010).
- 639 15. Pochon, X., Putnam, H., Burki, F. & Gates, R. Identifying and characterizing  
640 alternative molecular markers for the symbiotic and free-living dinoflagellate genus  
641 *Symbiodinium*. *PLoS One* **7**, e29816 (2012).
- 642 16. Baker, A. C. Flexibility and specificity in coral-algal symbiosis: Diversity, ecology,  
643 and biogeography of *Symbiodinium*. *Annu. Rev. Ecol. Evol. Syst.* **34**, 661–689 (2003).
- 644 17. Silverstein, R. N., Cunning, R. & Baker, A. C. Change in algal symbiont communities  
645 after bleaching, not prior heat exposure, increases heat tolerance of reef corals. *Glob.*  
646 *Chang. Biol.* **21**, 236–249 (2015).
- 647 18. Wilkinson, S. P., Pontasch, S., Fisher, P. L. & Davy, S. K. The distribution of intra-  
648 genomically variable dinoflagellate symbionts at Lord Howe Island, Australia. *Coral*  
649 *Reefs* **35**, 565–576 (2016).
- 650 19. Quigley, K. M. *et al.* Deep-sequencing method for quantifying background abundances  
651 of *Symbiodinium* types: exploring the rare *Symbiodinium* biosphere in reef-building  
652 corals. *PLoS One* **9**, e94297 (2014).
- 653 20. Arif, C. *et al.* Assessing *Symbiodinium* diversity in scleractinian corals via Next  
654 Generation Sequencing based genotyping of the ITS2 rDNA region. *Mol. Ecol.* **23**,  
655 4418–4433 (2014).
- 656 21. Boulotte, N. M. *et al.* Exploring the *Symbiodinium* rare biosphere provides evidence  
657 for symbiont switching in reef-building corals. *ISME J.* (2016).
- 658 22. Kenkel, C. D., Setta, S. P. & Matz, M. V. Heritable differences in fitness-related traits  
659 among populations of the mustard hill coral, *Porites astreoides*. *Heredity (Edinb.)* **115**,  
660 509–516 (2015).
- 661 23. Fabina, N. S., Putnam, H. M., Franklin, E. C., Stat, M. & Gates, R. D. Symbiotic  
662 specificity, association patterns, and function determine community responses to  
663 global changes: defining critical research areas for coral *Symbiodinium* symbioses.  
664 *Glob. Chang. Biol.* **19**, 3306–3316 (2013).
- 665 24. Berkelmans, R. & van Oppen, M. J. H. The role of zooxanthellae in the thermal  
666 tolerance of corals: a ‘nugget of hope’ for coral reefs in an era of climate change. *Proc.*

- 667 *R. Soc. B Biol. Sci.* **273**, 2305–2312 (2006).
- 668 25. Bay, L. K., Doyle, J., Logan, M. & Berkelmans, R. Recovery from bleaching is  
669 mediated by threshold densities of background thermo-tolerant symbiont types in a  
670 reef-building coral. *R. Soc. Open Sci.* **3**, 1–10 (2016).
- 671 26. Theis, K. R. *et al.* Getting the hologenome concept right: An eco-evolutionary  
672 framework for hosts and their microbiomes. *mSystems* **1**, e00028–16 (2016).
- 673 27. Cunning, R. & Baker, A. C. Not just who, but how many: the importance of partner  
674 abundance in reef coral symbioses. *Front. Microbiol.* **5**, 400 (2014).
- 675 28. Cunning, R., Silverstein, R. N. & Baker, A. C. Investigating the causes and  
676 consequences of symbiont shuffling in a multi-partner reef coral symbiosis under  
677 environmental change. *Proc. R. Soc. B* **282**, 20141725 (2015).
- 678 29. van Oppen, M. J. H., Oliver, J. K., Putnam, H. M. & Gates, R. D. Building coral reef  
679 resilience through assisted evolution. *Proc. Natl. Acad. Sci.* **112**, 2307–2313 (2015).
- 680 30. Baird, A. H., Guest, J. R. & Willis, B. L. Systematic and biogeographical patterns in  
681 the reproductive biology of scleractinian corals. *Annu. Rev. Ecol. Evol. Syst.* **40**, 551–  
682 571 (2009).
- 683 31. Douglas, A. E. & Werren, J. H. Holes in the hologenome: why host-microbe  
684 symbioses are not holobionts. *MBio* **7**, e02099–15 (2016).
- 685 32. Lynch, M. & Walsh, B. Genetics and analysis of quantitative traits. (1998).
- 686 33. Falconer, D. S. & Mackay, T. F. C. Introduction to Quantitative Genetics. *Longman*  
687 **19**, 1 (1995).
- 688 34. Visscher, P. M., Hill, W. G. & Wray, N. R. Heritability in the genomics era—concepts  
689 and misconceptions. *Nat. Rev. Genet.* **9**, 255–266 (2008).
- 690 35. Hedrick, P. W., Coltman, D. W., Festa-Bianchet, M. & Pelletier, F. Not surprisingly,  
691 no inheritance of a trait results in no evolution. *Proc. Natl. Acad. Sci.* **111**, E4810–  
692 E4810 (2014).
- 693 36. Houle, D. Comparing evolvability and variability of quantitative traits. *Genetics* **130**,  
694 195–204 (1992).
- 695 37. Wilson, A. J. *et al.* An ecologist’s guide to the animal model. *J. Anim. Ecol.* **79**, 13–26  
696 (2010).
- 697 38. Franzenburg, S. *et al.* Distinct antimicrobial peptide expression determines host  
698 species-specific bacterial associations. *Proc. Natl. Acad. Sci.* **110**, E3730–E3738  
699 (2013).
- 700 39. Ley, R. E. *et al.* Evolution of mammals and their gut microbes. *Science (80-. ).* **320**,



- 701 1647–1651 (2008).
- 702 40. Campbell, J. H. *et al.* Host genetic and environmental effects on mouse intestinal  
703 microbiota. *ISME J.* **6**, 2033–2044 (2012).
- 704 41. Benson, A. K. *et al.* Individuality in gut microbiota composition is a complex  
705 polygenic trait shaped by multiple environmental and host genetic factors. *Proc. Natl.*  
706 *Acad. Sci.* **107**, 18933–18938 (2010).
- 707 42. Parkinson, J. F., Gobin, B. & Hughes, W. O. H. Heritability of symbiont density  
708 reveals distinct regulatory mechanisms in a tripartite symbiosis. *Ecol. Evol.* (2016).
- 709 43. Liu, C. M. *et al.* *Staphylococcus aureus* and the ecology of the nasal microbiome. *Sci.*  
710 *Adv.* **1**, e1400216 (2015).
- 711 44. Davy, S. K., Allemand, D. & Weis, V. M. Cell biology of cnidarian-dinoflagellate  
712 symbiosis. *Microbiol. Mol. Biol. Rev.* **76**, 229–261 (2012).
- 713 45. Kuniya, N. *et al.* Possible involvement of Tachylectin-2-like lectin from *Acropora*  
714 *tenuis* in the process of *Symbiodinium* acquisition. *Fish. Sci.* **81**, 473–483 (2015).
- 715 46. Suzuki, G. *et al.* Early uptake of specific symbionts enhances the post-settlement  
716 survival of *Acropora* corals. *Mar. Ecol. Prog. Ser.* **494**, 149–158 (2013).
- 717 47. Yamashita, H., Suzuki, G., Hayashibara, T. & Koike, K. *Acropora* recruits harbor  
718 ‘rare’ *Symbiodinium* in the environmental pool. *Coral Reefs* **32**, 355–366 (2013).
- 719 48. Gómez-Cabrera, M. del C., Ortiz, J. C., Loh, W. K. W., Ward, S. & Hoegh-Guldberg,  
720 O. Acquisition of symbiotic dinoflagellates (*Symbiodinium*) by juveniles of the coral  
721 *Acropora longicyathus*. *Coral Reefs* **27**, 219–226 (2008).
- 722 49. Cumbo, V. R., Baird, A. H. & van Oppen, M. J. H. The promiscuous larvae: flexibility  
723 in the establishment of symbiosis in corals. *Coral Reefs* 1–10 (2013).
- 724 50. Abrego, D., van Oppen, M. J. H. & Willis, B. L. Highly infectious symbiont dominates  
725 initial uptake in coral juveniles. *Mol. Ecol.* **18**, 3518–3531 (2009).
- 726 51. Nitschke, M. R., Davy, S. K. & Ward, S. Horizontal transmission of *Symbiodinium*  
727 cells between adult and juvenile corals is aided by benthic sediment. *Coral Reefs* 1–10  
728 (2015).
- 729 52. Silverstein, R. The importance of the rare: the role of background *Symbiodinium* in the  
730 response of reef corals to environmental change. (2012).
- 731 53. Jones, A. M., Berkelmans, R., van Oppen, M. J. H., Mieog, J. C. & Sinclair, W. A  
732 community change in the algal endosymbionts of a scleractinian coral following a  
733 natural bleaching event: field evidence of acclimatization. *Proc. R. Soc. B Biol. Sci.*  
734 **275**, 1359–1365 (2008).



- 735 54. LaJeunesse, T. C., Smith, R. T., Finney, J. & Oxenford, H. Outbreak and persistence of  
736 opportunistic symbiotic dinoflagellates during the 2005 Caribbean mass coral  
737 'bleaching' event. *Proc. R. Soc. B Biol. Sci.* **276**, 4139–4148 (2009).
- 738 55. Lee, M. J. *et al.* Most low-abundance 'background' *Symbiodinium* spp. are transitory  
739 and have minimal functional significance for symbiotic corals. *Microb. Ecol.* 1–13  
740 (2016). doi:10.1007/s00248-015-0724-2
- 741 56. Bourne, D. G., Morrow, K. M. & Webster, N. S. Insights into the coral microbiome:  
742 underpinning the health and resilience of reef ecosystems. *Annu. Rev. Microbiol.* **70**,  
743 317–340 (2016).
- 744 57. Ainsworth, T. D. *et al.* The coral core microbiome identifies rare bacterial taxa as  
745 ubiquitous endosymbionts. *ISME J.* **9**, 2261–2274 (2015).
- 746 58. Padilla-Gamiño, J. L., Pochon, X., Bird, C., Concepcion, G. T. & Gates, R. D. From  
747 parent to gamete: vertical transmission of *Symbiodinium* (Dinophyceae) ITS2 sequence  
748 assemblages in the reef building coral *Montipora capitata*. *PLoS One* **7**, e38440  
749 (2012).
- 750 59. Oliver, K. M., Smith, A. H. & Russell, J. A. Defensive symbiosis in the real world—  
751 advancing ecological studies of heritable, protective bacteria in aphids and beyond.  
752 *Funct. Ecol.* **28**, 341–355 (2014).
- 753 60. Moran, N. A., McCutcheon, J. P. & Nakabachi, A. Genomics and evolution of  
754 heritable bacterial symbionts. *Annu. Rev. Genet.* **42**, 165–190 (2008).
- 755 61. Vautrin, E. & Vavre, F. Interactions between vertically transmitted symbionts:  
756 cooperation or conflict? *Trends Microbiol.* **17**, 95–99 (2009).
- 757 62. Hirose, M. & Hidaka, M. Early development of zooxanthella-containing eggs of the  
758 corals *Porites cylindrica* and *Montipora digitata*: The endodermal localization of  
759 zooxanthellae. *Zoolog. Sci.* **23**, 873–881 (2006).
- 760 63. Ulstrup, K. E., Kuhl, M. & Bourne, D. G. Zooxanthellae harvested by ciliates  
761 associated with brown band syndrome of corals remain photosynthetically competent.  
762 *Appl. Environ. Microbiol.* **73**, 1968–1975 (2007).
- 763 64. Hirose, M., Reimer, J. D., Hidaka, M. & Suda, S. Phylogenetic analyses of potentially  
764 free-living *Symbiodinium* spp. isolated from coral reef sand in Okinawa, Japan. *Mar.*  
765 *Biol.* **155**, 105–112 (2008).
- 766 65. Santos, S. R. Comment on Phylogenetic analysis of free-living strain of *Symbiodinium*  
767 isolate from Jiaozhou Bay, PR China. *J. Phycol.* **40**, 395–397 (2004).
- 768 66. Ritson-Williams, R. *et al.* New perspectives on ecological mechanisms affecting coral

- 769 recruitment on reefs. *Smithson. Contrib. fo Mar. Sci.* **38**, 437–457 (2009).
- 770 67. Wolf, J. B. & Wade, M. J. What are maternal effects (and what are they not)? *Philos.*  
771 *Trans. R. Soc. B Biol. Sci.* **364**, 1107–1115 (2009).
- 772 68. Weis, V., Reynolds, W., DeBoer, M. & Krupp, D. Host-symbiont specificity during  
773 onset of symbiosis between the dinoflagellates *Symbiodinium spp.* and planula larvae  
774 of the scleractinian coral *Fungia scutaria*. *Coral Reefs* **20**, 301–308 (2001).
- 775 69. Schwarz, J. A., Krupp, D. A. & Weis, V. M. Late larval development and onset of  
776 symbiosis in the scleractinian coral *Fungia scutaria*. *Biol. Bull.* **196**, 70–79 (1999).
- 777 70. Markell, D. A. & Wood-Charlson, E. M. Immunocytochemical evidence that  
778 symbiotic algae secrete potential recognition signal molecules in hospite. *Mar. Biol.*  
779 **157**, 1105–1111 (2010).
- 780 71. Bay, L. K. *et al.* Infection dynamics vary between *Symbiodinium* types and cell surface  
781 treatments during establishment of endosymbiosis with coral larvae. *Diversity* **3**, 356–  
782 374 (2011).
- 783 72. Fransolet, D., Roberty, S. & Plumier, J.-C. Establishment of endosymbiosis: The case  
784 of cnidarians and *Symbiodinium*. *J. Exp. Mar. Bio. Ecol.* **420-421**, 1–7 (2012).
- 785 73. Mohamed, A. R. *et al.* The transcriptomic response of the coral *Acropora digitifera* to  
786 a competent *Symbiodinium* strain: the symbiosome as an arrested early phagosome.  
787 *Mol. Ecol.* (2016).
- 788 74. Schnitzler, C. E. & Weis, V. M. Coral larvae exhibit few measurable transcriptional  
789 changes during the onset of coral-dinoflagellate endosymbiosis. *Mar. Genomics* **3**,  
790 107–116 (2010).
- 791 75. Cho, J. The heritable immune system. *Nat. Biotechnol.* **33**, 608–609 (2015).
- 792 76. Roederer, M. *et al.* The genetic architecture of the human immune system: a  
793 bioresource for autoimmunity and disease pathogenesis. *Cell* **161**, 387–403 (2015).
- 794 77. Gates, R. D., Hoegh-Guldberg, O., McFall-Ngai, M. J., Bil, K. Y. & Muscatine, L.  
795 Free amino acids exhibit anthozoan ‘host factor’ activity: They induce the release of  
796 photosynthate from symbiotic dinoflagellates *in-vitro*. *Proc. Natl. Acad. Sci.* **92**, 7430–  
797 7434 (1995).
- 798 78. Lee, S. T. M., Davy, S. K., Tang, S.-L. & Kench, P. S. Mucus sugar content shapes the  
799 bacterial community structure in thermally stressed *Acropora muricata*. *Front.*  
800 *Microbiol.* **7**, (2016).
- 801 79. Hagedorn, M. *et al.* Trehalose is a chemical attractant in the establishment of coral  
802 symbiosis. *PLoS One* **10**, e0117087 (2015).

- 803 80. Lewis, Z. T. *et al.* Maternal fucosyltransferase 2 status affects the gut bifidobacterial  
804 communities of breastfed infants. *Microbiome* **3**, 1 (2015).
- 805 81. Golberg, K., Eltzov, E., Shnit-Orland, M., Marks, R. S. & Kushmaro, A.  
806 Characterization of quorum sensing signals in coral-associated bacteria. *Microb. Ecol.*  
807 **61**, 783–792 (2011).
- 808 82. Quigley, K. M., Willis, B. L. & Bay, L. K. Maternal effects and *Symbiodinium*  
809 community composition drive differential patterns in juvenile survival in the coral  
810 *Acropora tenuis*. *R. Soc. Open Sci.* **3**, 1–17 (2016).
- 811 83. Gloor, G. B. *et al.* Type I repressors of P element mobility. *Genetics* **135**, 81–95  
812 (1993).
- 813 84. Edgar, R. C. UPARSE: highly accurate OTU sequences from microbial amplicon  
814 reads. *Nat. Methods* **10**, 996–998 (2013).
- 815 85. Altschul, S. F., Gish, W., Miller, W., Myers, E. W. & Lipman, D. J. Basic local  
816 alignment search tool. *J. Mol. Biol.* **215**, 403–410 (1990).
- 817 86. Camacho, C. *et al.* BLAST+: architecture and applications. *BMC Bioinformatics* **10**,  
818 (2009).
- 819 87. Ziegler, M. *et al.* Biogeography and molecular diversity of coral symbionts in the  
820 genus *Symbiodinium* around the Arabian Peninsula. *J. Biogeogr.* (2017).
- 821 88. Paradis, E., Claude, J. & Strimmer, K. APE: analyses of phylogenetics and evolution  
822 in R language. *Bioinformatics* **20**, 289–290 (2004).
- 823 89. FitzJohn, R. G. Diversitree: comparative phylogenetic analyses of diversification in R.  
824 *Methods Ecol. Evol.* **3**, 1084–1092 (2012).
- 825 90. Sievers, F. *et al.* Fast, scalable generation of high-quality protein multiple sequence  
826 alignments using Clustal Omega. *Mol. Syst. Biol.* **7**, (2011).
- 827 91. Galand, P. E., Casamayor, E. O., Kirchman, D. L. & Lovejoy, C. Ecology of the rare  
828 microbial biosphere of the Arctic Ocean. *Proc. Natl. Acad. Sci.* **106**, 22427–22432  
829 (2009).
- 830 92. Pedrós-Alió, C. The Rare Bacterial Biosphere. *Ann. Rev. Mar. Sci.* **4**, 449–466 (2012).
- 831 93. Logares, R. *et al.* Patterns of rare and abundant marine microbial eukaryotes. *Curr.*  
832 *Biol.* **24**, 813–821 (2014).
- 833 94. LaJeunesse, T. C. *et al.* Specificity and stability in high latitude eastern Pacific coral-  
834 algal symbioses. *Limnol. Oceanogr.* **53**, 719–727 (2008).
- 835 95. Mieog, J., van Oppen, M., Cantin, N., Stam, W. & Olsen, J. Real-time PCR reveals a  
836 high incidence of *Symbiodinium*; clade D at low levels in four scleractinian corals

- 837 across the Great Barrier Reef: implications for symbiont shuffling. *Coral Reefs* **26**,  
838 449–457 (2007).
- 839 96. Love, M. I., Huber, W. & Anders, S. Moderated estimation of fold change and  
840 dispersion for RNA-seq data with DESeq2. *Genome Biol.* **15**, 1–21 (2014).
- 841 97. McMurdie, P. J. & Holmes, S. phyloseq: an R package for reproducible interactive  
842 analysis and graphics of microbiome census data. *PLoS One* **8**, e61217 (2013).
- 843 98. R Core Team. R: A language and environment for statistical computing. (2012).
- 844 99. Leinster, T. & Cobbold, C. A. Measuring diversity: the importance of species  
845 similarity. *Ecology* **93**, 477–489 (2012).
- 846 100. Cunning, R. & Baker, A. C. Excess algal symbionts increase the susceptibility of reef  
847 corals to bleaching. *Nat. Clim. Chang.* (2012).
- 848 101. Cunning, R. *et al.* Dynamic regulation of partner abundance mediates response of reef  
849 coral symbioses to environmental change. *Ecology* **96**, 1411–1420 (2015).
- 850 102. Abrego, D., van Oppen, M. J. H. & Willis, B. L. Onset of algal endosymbiont  
851 specificity varies among closely related species of *Acropora* corals during early  
852 ontogeny. *Mol. Ecol.* **18**, 3532–3543 (2009).
- 853 103. Wilson, A. J., Kruuk, L. E. B. & Coltman, D. W. Ontogenetic patterns in heritable  
854 variation for body size: using random regression models in a wild ungulate population.  
855 *Am. Nat.* **166**, E177–E192 (2005).
- 856 104. Clayton, G. A., Morris, J. A. & Robertson, A. An experimental check on quantitative  
857 genetical theory I. Short-term responses to selection. *J. Genet.* **55**, 131–151 (1957).
- 858 105. Villemereuil, P., Gimenez, O. & Doligez, B. Comparing parent–offspring regression  
859 with frequentist and Bayesian animal models to estimate heritability in wild  
860 populations: a simulation study for Gaussian and binary traits. *Methods Ecol. Evol.* **4**,  
861 260–275 (2013).
- 862 106. Kruuk, L. E. B. Estimating genetic parameters in natural populations using the ‘animal  
863 model’. *Philos. Trans. R. Soc. London B Biol. Sci.* **359**, 873–890 (2004).
- 864 107. Hadfield, J. D. MCMC methods for multi-response generalized linear mixed models:  
865 the MCMCglmm R package. *J. Stat. Softw.* **33**, 1–22 (2010).
- 866 108. Pinheiro, J., Bates, D., DebRoy, S. & Sarkar, D. Core Team R. 2014. Nlme: linear and  
867 nonlinear mixed effects models. R package version 3.1-118.
- 868 109. Wham, D., Pettay, D. & LaJeunesse, T. Microsatellite loci for the host-generalist  
869 ‘zooxanthella’ & *Symbiodinium trenchi* and other Clade D *Symbiodinium*. *Conserv.*  
870 *Genet. Resour.* **3**, 541–544 (2011).

- 871 110. LaJeunesse, T. C. *et al.* Ecologically differentiated stress-tolerant endosymbionts in the  
872 dinoflagellate genus *Symbiodinium* (Dinophyceae) Clade D are different species.  
873 *Phycologia* **53**, 305–319 (2014).
- 874 111. Parkinson, J. E., Coffroth, M. A. & LaJeunesse, T. C. New species of Clade B  
875 *Symbiodinium* (Dinophyceae) from the greater Caribbean belong to different  
876 functional guilds: *S. aenigmaticum* sp. nov., *S. antillogorgium* sp. nov., *S.*  
877 *endomadracis* sp. nov., and *S. pseudominutum* sp. nov. *J. Phycol.* **51**, 850–858 (2015).
- 878 112. Thornhill, D. J., Lewis, A. M., Wham, D. C. & LaJeunesse, T. C. Host-specialist  
879 lineages dominate the adaptive radiation of reef coral endosymbionts. *Evolution (N. Y.)*  
880 **68**, 352–367 (2014).
- 881 113. Hume, B. C. C. *et al.* *Symbiodinium thermophilum* sp. nov., a thermotolerant symbiotic  
882 alga prevalent in corals of the world’s hottest sea, the Persian/Arabian Gulf. *Sci. Rep.*  
883 **5**, 1–8 (2015).
- 884 114. Green, E. A., Davies, S. W., Matz, M. V & Medina, M. Quantifying cryptic  
885 *Symbiodinium* diversity within *Orbicella faveolata* and *Orbicella franksi* at the Flower  
886 Garden Banks, Gulf of Mexico. *PeerJ* **2**, e386 (2014).

887

## 888 **Acknowledgements**

889 We would like to thank Margaux Hein, Mikhail Matz, Marie Strader, Greg Torda,  
890 Sarah Davies, Natalie Andrade, Tess Hill and the staff at Orpheus Island Research Station for  
891 help with field work and spawning at Orpheus Island. We also thank Dr. Ray Berkelmans and  
892 the crew on the RV Ferguson for help with the collection of corals from the northern GBR.

893 All samples of *A. tenuis* from Wilkie Island and Orpheus Island and *M. digitata* from  
894 Orpheus Island were collected under Great Barrier Reef Marine Park Authority permits:  
895 G12/35236.1, G13/36318.1, and G10/33312.1. Funding was provided by the Australian  
896 Research Council through ARC CE1401000020, ARC DP130101421 to B.L.W. and AIMS to  
897 L.K.B.

898

## 899 **Author Contributions**

900 K.M.Q., B.L.W., and L.K.B. designed and conducted the experiments, K.M.Q. analysed the  
901 data and wrote the manuscript, and all authors made comments on the manuscript.

902

903 **Competing Financial Interest:** The authors declare no competing final interests.

904 **Data availability statement:** All raw sequencing data will be deposited in the NCBI  
905 Sequence Read Archive under Accession number SRX.

906

907 **Figure 1.** Fan dendrogram of 261 *Symbiodinium* ITS-2 OTUs retrieved from *Acropora tenuis*  
908 juveniles and adults in 2012 (a) and 2013 (b). The Neighbour-Joining dendrogram was  
909 constructed using raw APE alignments of only those OTUs that were retrieved from three or  
910 more samples (134/422 OTUs in 2012 and 181/568 OTUs in 2013). Concentric circles from  
911 innermost to the outermost position represent OTUs present: 1) life-stage, 2) normalized  
912 abundance (principal: > 0.01%, background < 0.01%), and 3) ubiquity (core: >75% of  
913 samples, common: 25-75%, rare: < 25%). OTU identity with an asterisk indicates it was  
914 retrieved in both years. Semi-transparent backgrounds represent clade designations of  
915 individual OTUs. See Supplementary Table S8 for full taxonomic information.

916

917 **Figure 2.** Barplots of variance-normalized abundances of *Symbiodinium* diversity associated  
918 with (a) juveniles and (b) adults of *Acropora tenuis* used in 2012 (Year 1) and 2013 (Year 2)  
919 crosses. Colours represent different *Symbiodinium* types. Origins of parent colonies are  
920 Orpheus and Wilkie reefs. *A. tenuis* adult colonies from Orpheus used for 2013 crosses  
921 included samples that were sequenced that represent the left side of the colony (L), center of  
922 the colony (C), and right side of the colony (R) to examine intra-colony *Symbiodinium*  
923 diversity.

924

925 **Figure 3.** Fan dendrogram of 101 *Symbiodinium* ITS-2 OTUs retrieved from *Montipora*  
926 *digitata* eggs and adults. The Neighbour-Joining dendrogram was constructed using raw APE  
927 alignments. Concentric circles from innermost to the outermost position represent OTUs  
928 present: 1) life-stage, 2) normalized abundance (principal: > 0.01%, background < 0.01%), 3)  
929 ubiquity (core: >75% of samples, common: 25-75%, rare: < 25%), and 4) dam identity. Semi-  
930 transparent backgrounds represent clade designations of individual OTUs. Red text indicates  
931 OTUs that were found in three or more eggs or adults. See Supplementary Table S8 for full  
932 taxonomic information.

933

934 **Figure 4.** Barplot of variance-normalized abundances of only the background *Symbiodinium*  
935 diversity associated with dams and eggs of *Montipora digitata*. Colours represent different  
936 *Symbiodinium* types. The dominant type, C15, was excluded for clarity. The first bar in each

937 group is the spawning dam and the following bars represent her eggs. The tenth egg sample  
938 from dam 11 (M11) was made up of 100% C15, and was therefore not shown.

939

940 **Figure 5.** Posterior distributions of the heritability estimates for *A. tenuis* (dark grey) and *M.*  
941 *digitata* (light grey) generated from Bayesian MCMCglmm models. Dashed and full lines  
942 correspond to distribution modes and means, respectively.

943



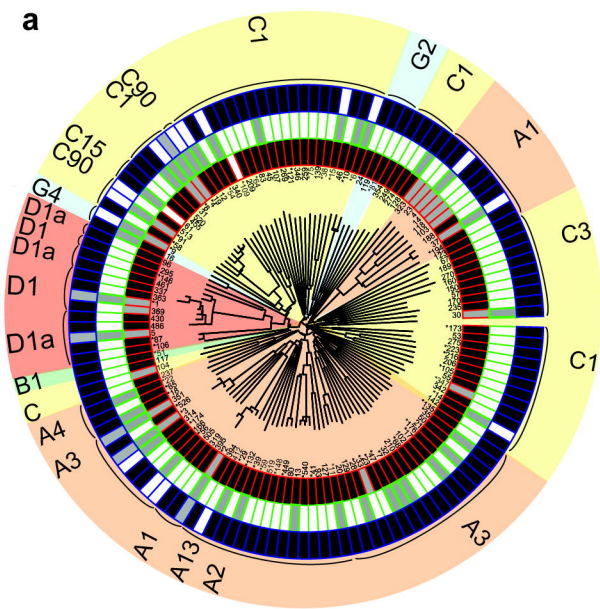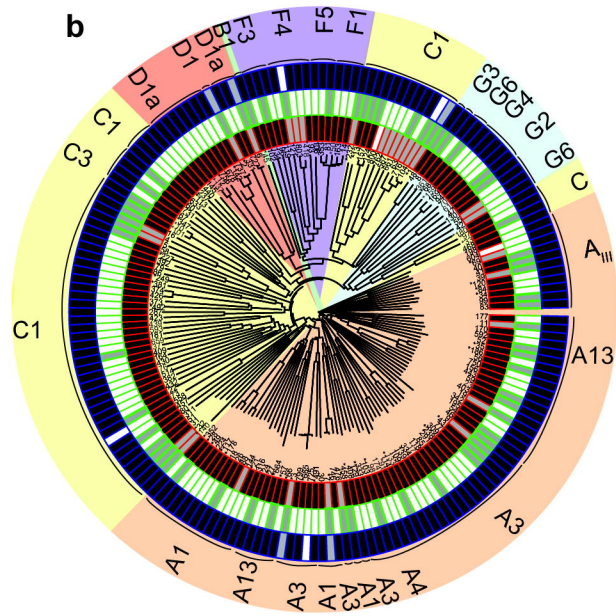

**Clade:**

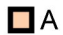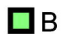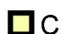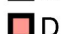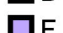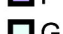

**Life stage:**

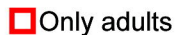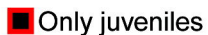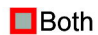

**Abundance:**

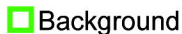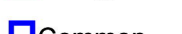

**Ubiquity:**

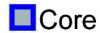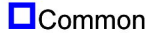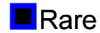

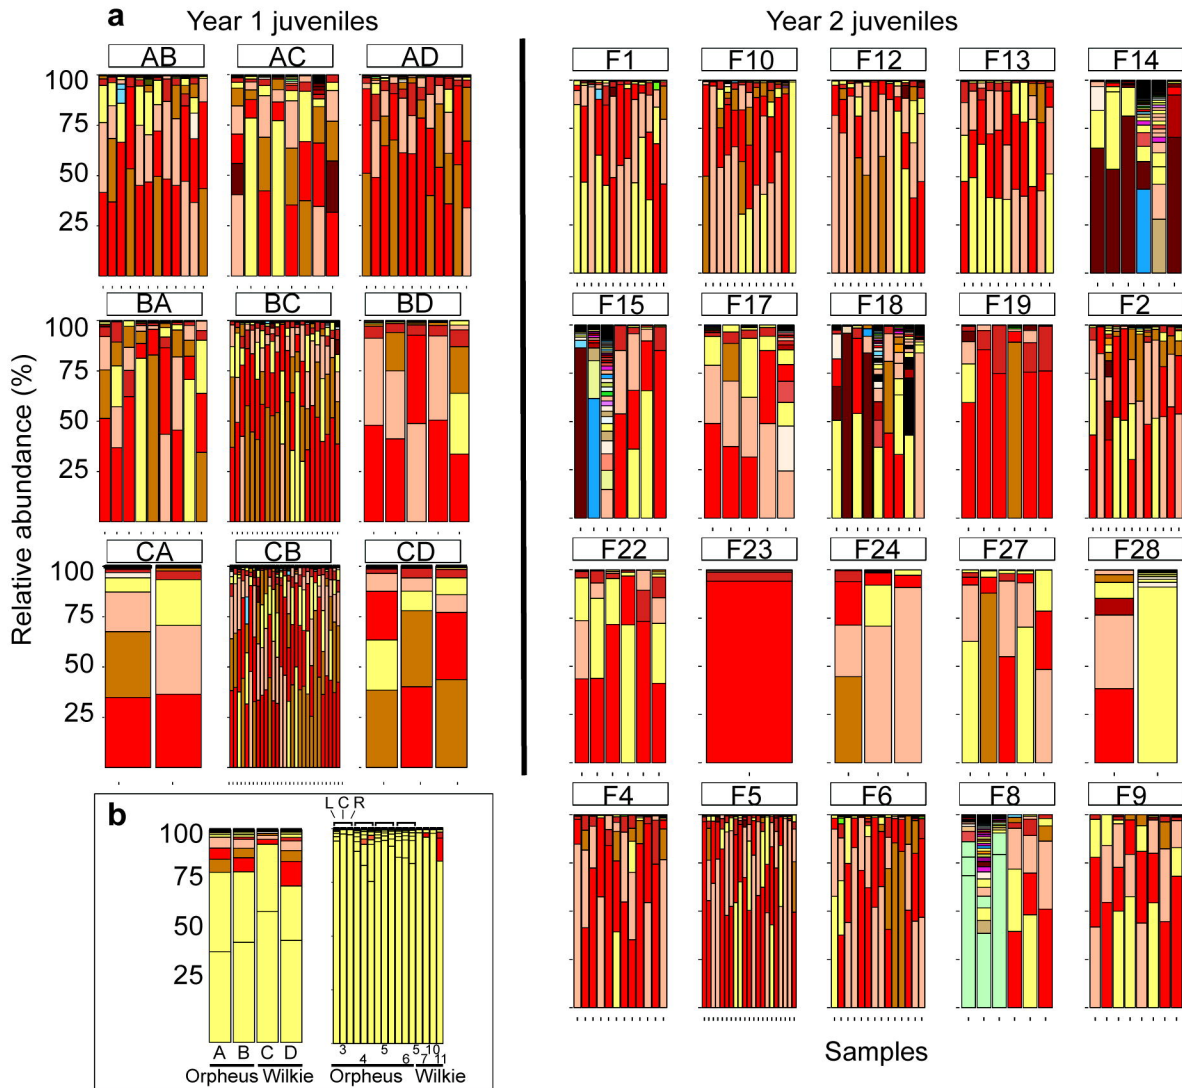

■ *S. microadriaticum* (A1)  
 ■ *S. pilosum* (A2)  
 ■ *S. tridacnidorum* (A3)  
 ■ *S. linucheae* (A4)  
 ■ *S. natans*  
 ■ *S. necroappetens* (A13)

■ *S. minutum* (B1)  
 ■ *S. psygrophilum* (B2)  
 ■ *S. muscatinei* (B4)  
 ■ B16

■ *S. goreau* (C1)  
 ■ C3  
 ■ C15  
 ■ C33  
 ■ C90  
 ■ C91

■ D  
 ■ *S. glynnii* (D1)  
 ■ *S. trenchii* (D1a)  
 ■ *S. voratum* (E)

■ *S. kawagutii* (F1)  
 ■ F2  
 ■ F3.2  
 ■ F4  
 ■ F5

■ G2  
 ■ G3.4  
 ■ G4  
 ■ G6  
 ■ H1  
 ■ I

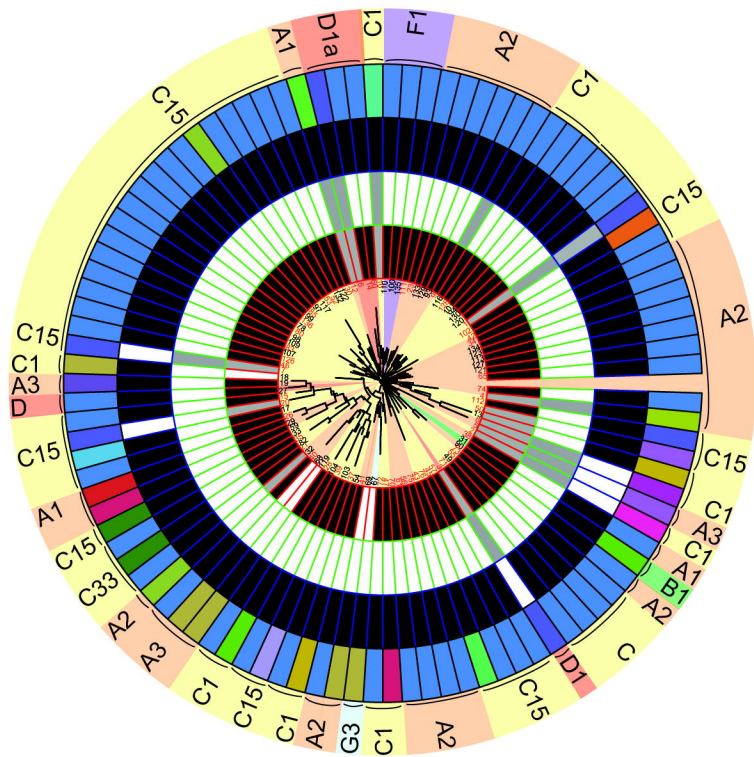

**Life stage:**

- Only adults
- Only juveniles
- Both

**Abundance:**

- Dominant
- Background

**Ubiquity:**

- Core
- Common
- Rare

**Clade:**

- |                                             |                                                       |                                                            |                                                       |
|---------------------------------------------|-------------------------------------------------------|------------------------------------------------------------|-------------------------------------------------------|
| <span style="color: orange;">■</span> A     | <span style="color: blue;">■</span> 29                | <span style="color: green;">■</span> 8                     | <span style="color: darkgreen;">■</span> 9            |
| <span style="color: lightgreen;">■</span> B | <span style="color: magenta;">■</span> 24,28,29,7,8,9 | <span style="color: red;">■</span> 28                      | <span style="color: purple;">■</span> 7               |
| <span style="color: yellow;">■</span> C     | <span style="color: blue;">■</span> All dams          | <span style="color: cyan;">■</span> 28,32                  | <span style="color: lightgreen;">■</span> 26,28,29,32 |
| <span style="color: red;">■</span> D        | <span style="color: magenta;">■</span> 26             | <span style="color: orange;">■</span> 8,28,32              | <span style="color: green;">■</span> 24,7             |
| <span style="color: purple;">■</span> F     | <span style="color: olive;">■</span> Adult only       | <span style="color: green;">■</span> 11,24,26,28,29,9      |                                                       |
| <span style="color: white;">■</span> G      | <span style="color: olive;">■</span> 32               | <span style="color: purple;">■</span> 11,24,26,28,29,7,8,9 |                                                       |
|                                             | <span style="color: blue;">■</span> 8,9               | <span style="color: purple;">■</span> 11,24,26,28,32,7,8,9 |                                                       |
|                                             | <span style="color: green;">■</span> 11               | <span style="color: green;">■</span> 24                    |                                                       |

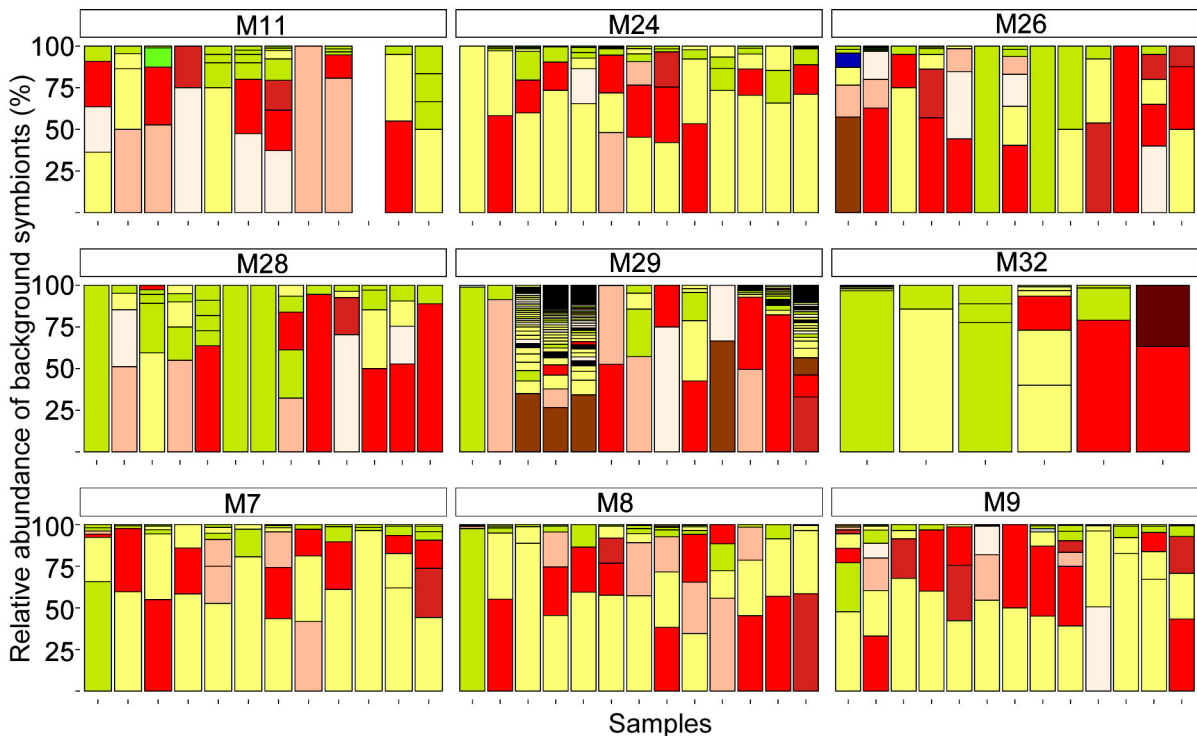

*S. microadriaticum* (A1)  
 *S. pilosum* (A2)  
 *S. tridacnidorum* (A3)  
 *S. minutum* (B1)

*S. goreaui* (C1)  
 C15  
 C33

D  
 *S. glynnii* (D1)  
 *S. trenchii* (D1a)  
 *S. voratum* (E)  
 CCMP2455 (F)  
 G3.3

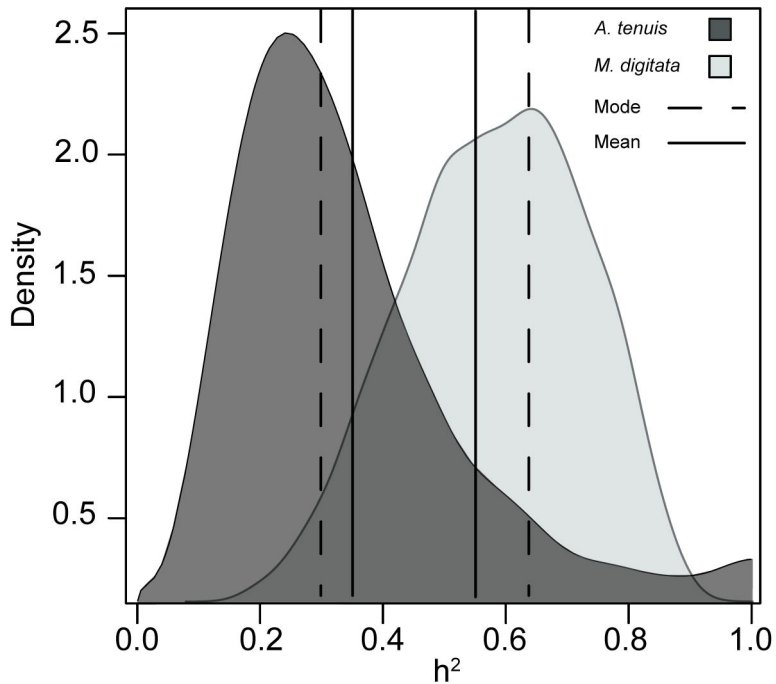

Source: https://www.biorxiv.org/content/10.1101/100453v2.full.pdf
